# Supplementary material for: Composite cell sheet for periodontal regeneration: crosstalk between different types of MSCs in cell sheet facilitates complex periodontal-like tissue regeneration
Source: PubMed Central journal article supplement (PMC5109898; doi:10.1186/s13287-016-0417-x), 2016-11-14

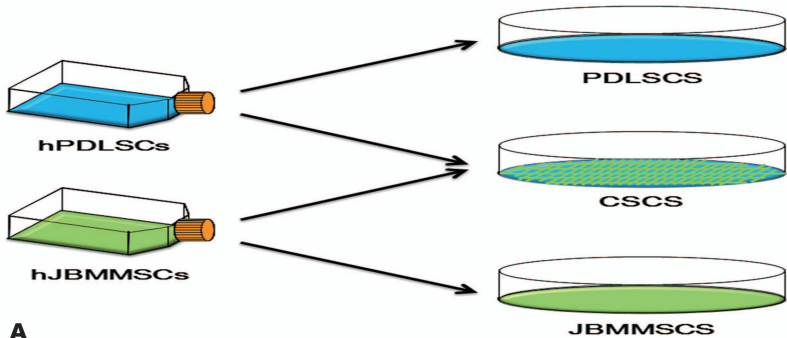

**A**

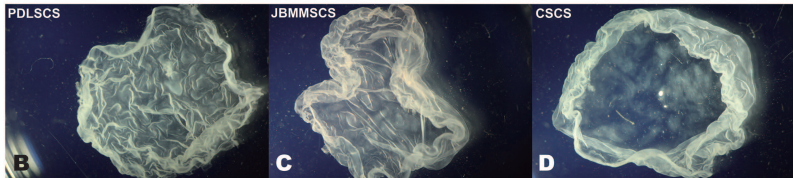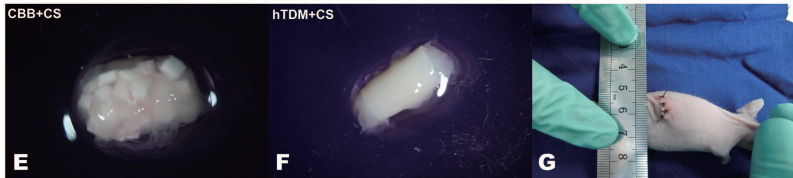

Supplement: 13287_2016_417_MOESM1_ESM.pdf [file 13287_2016_417_MOESM1_ESM.pdf]
