# Supplementary material for: Composite cell sheet for periodontal regeneration: crosstalk between different types of MSCs in cell sheet facilitates complex periodontal-like tissue regeneration
Source: PubMed Central journal article supplement (PMC5109898; doi:10.1186/s13287-016-0417-x), 2016-11-14
Supplement: 13287_2016_417_MOESM2_ESM.pdf [file 13287_2016_417_MOESM2_ESM.pdf]

**material only**

**hPDLSCs adhered**

**hJBMMSCs adhered**

**hTDM**

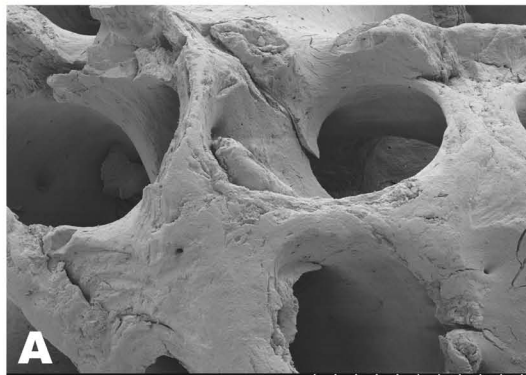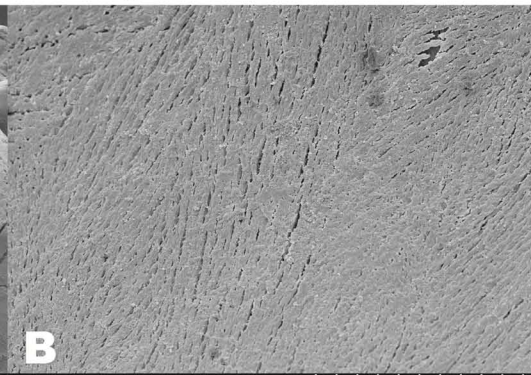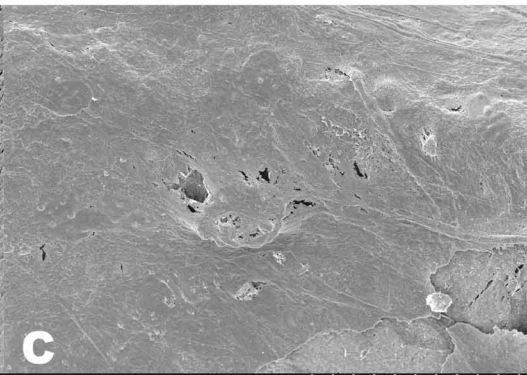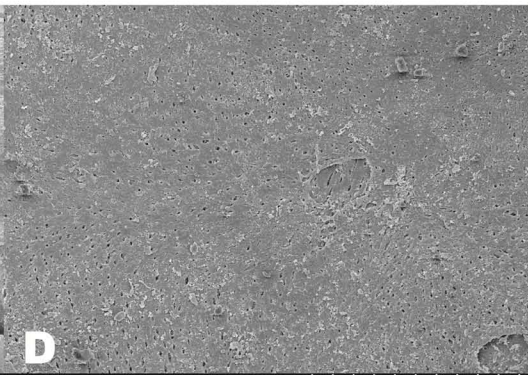

S-4800 5.0kV 9.8mm x100 SE(M)

500μm

S-4800 5.0kV 9.2mm x1.00k SE(M)

50.0μm

S-4800 5.0kV 9.3mm x1.00k SE(M)

50.0μm

S-4800 5.0kV 9.8mm x1.00k SE(M)

50.0μm

**CBB**

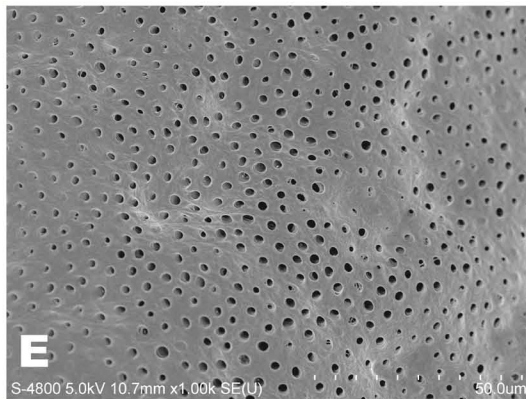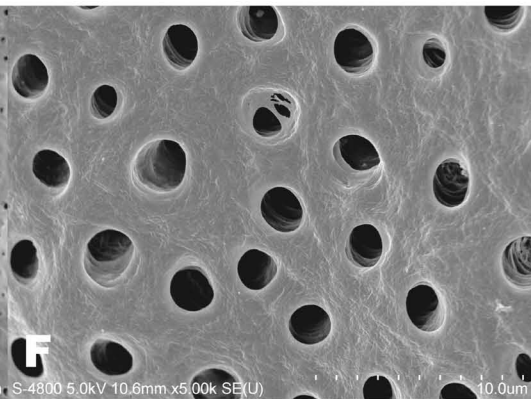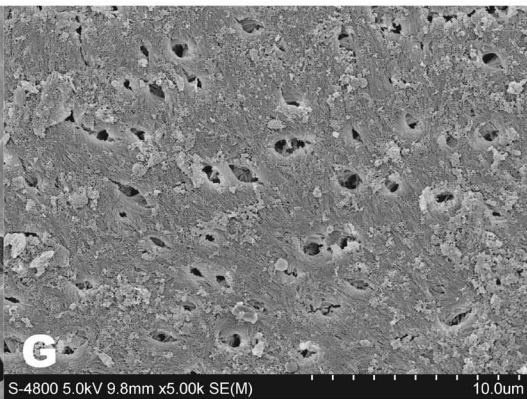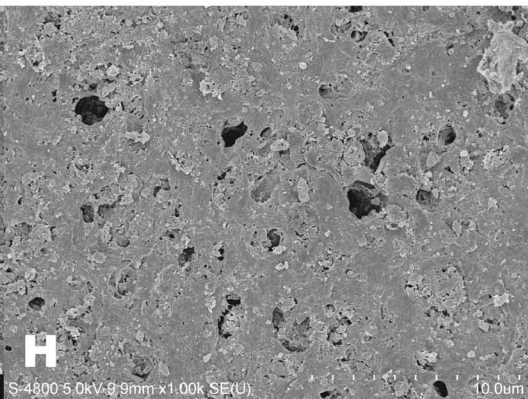

S-4800 5.0kV 10.7mm x1.00k SE(U)

50.0μm

S-4800 5.0kV 10.6mm x5.00k SE(U)

10.0μm

S-4800 5.0kV 9.8mm x5.00k SE(M)

10.0μm

S-4800 5.0kV 9.9mm x1.00k SE(U)

10.0μm
